# Supplementary material for: Studies on Algae from the Order Synurales (Chrysophyceae) in Northern Vietnam
Source: MDPI journal article supplement (doi:10.3390/d13110602), 2021-11-21
Supplement: s1 [file s1]

**Table S1.** Basic characteristics of the localities (No. – number of a sample; Cond. – specific conductance,  $\mu\text{S cm}^{-1}$ ; T – temperature,  $^{\circ}\text{C}$ ; Chl *a* – chlorophyll *a*,  $\mu\text{g l}^{-1}$ ; TS – trophic state: O – oligotrophic, M – mesotrophic, E – eutrophic, H – hypereutrophic).

| No.                       | Name                                               | Coordinates                 | pH  | Cond. | T  | Chl<br><i>a</i> | TS |
|---------------------------|----------------------------------------------------|-----------------------------|-----|-------|----|-----------------|----|
| <b>Hanoi</b>              |                                                    |                             |     |       |    |                 |    |
| 1                         | Hồ Tien Sa (Tien Sa Reservoir) Ba Vi National Park | N21° 04.979' E105° 22.225'  | 8.2 | 74    | 28 | 30              | H  |
| 2                         | Hồ Ao Vua (Ao Vua Reservoir)                       | N21° 05.802' E105° 22.484'  | 7.5 | 100   | 27 | 14              | E  |
| 3                         | Van Hoa Commune, Ba Vi District                    | N21° 05.904' E105° 25.290'  | 8.1 | 136   | 28 | 34              | H  |
| 4                         | Hồ Suối Hai (Suoi Hai Reservoir)                   | N21° 09.750' E105° 23.023'  | 7.8 | 155   | 27 | 48              | H  |
| 5                         | Cam Linh Commune, Ba Vi District                   | N21° 09.790' E105° 23.115'  | 7.2 | 252   | 27 | 101             | H  |
| 6                         | Hồ Cẩm Quỳ (Cam Quy Reservoir)                     | N21° 08.923' E105° 20.877'  | 7.3 | 162   | 28 | 114             | H  |
| 7                         | Đầm Long (Dam Long Wetland)                        | N21° 10.279' E105° 20.021'  | 7.1 | 182   | 27 | 137             | H  |
| 8                         | Đầm Long (Dam Long Wetland)                        | N21° 10.270' E105° 19.993'  | 7.0 | 216   | 27 | 233             | H  |
| 9                         | Đầm Long (Dam Long Wetland)                        | N21° 10.563' E105° 19.059'  | 8.0 | 181   | 28 | 53              | H  |
| 10                        | Hồ Thạch Sa (Thach Sa Reservoir)                   | N21° 01.211' E105° 19.191'  | 8.3 | 227   | 28 | 72              | H  |
| 11                        | Khanh Thuong Commune, Ba Vi District               | N21° 00.965' E105° 19.326'  | 8.0 | 278   | 29 | 49              | H  |
| 12                        | Sông Đà (Da River)                                 | N21° 05.197' E105° 18.924'  | 7.8 | 153   | 25 | 3               | O  |
| 13                        | Đập Vồng (Dap Vong Reservoir)                      | N21° 03.177' E105° 18.391'  | 8.5 | 161   | 29 | 61              | H  |
| 14                        | Minh Quang Commune, Ba Vi District                 | N21° 02.514' E105° 18.464'  | 8.2 | 154   | 29 | 102             | H  |
| 15                        | Khanh Thuong Commune, Ba Vi District               | N21° 01.976' E105° 18.701'  | 8.2 | 69    | 29 | 30              | H  |
| 16                        | Khanh Thuong Commune, Ba Vi District               | N21° 01.917' E105° 19.243'  | 7.2 | 167   | 28 | 209             | H  |
| 17                        | Hồ Xuân Khanh (Xuan Khanh Reservoir)               | N21° 08.133' E105° 26.106'  | 7.6 | 216   | 64 | 29              | H  |
| 18                        | Hồ Đồng Mô (Dong Mo Reservoir)                     | N21° 04.575' E105° 28.453'  | 7.7 | 97    | 27 | 17              | E  |
| 19                        | Hồ Duy Minh 2 (Duy Minh 2 Reservoir)               | N21° 00.528' E105° 31.266'  | 7.3 | 587   | 27 | 20              | E  |
| 20                        | Hồ Hòa Lạc (Hoa Lac Reservoir)                     | N20° 59.354' E105° 30.439'  | 8.2 | 141   | 27 | 23              | E  |
| <b>Ninh Binh Province</b> |                                                    |                             |     |       |    |                 |    |
| 21                        | Hồ Mạc (Mac Lake) Cúc Phương National Park         | N20° 15.470' E 105° 42.432' | 8.3 | 206   | 29 | 42              | H  |

|                           |                                                                            |                             |     |     |    |     |   |
|---------------------------|----------------------------------------------------------------------------|-----------------------------|-----|-----|----|-----|---|
| 22                        | Small lake in the forest in Cúc Phương National Park                       | N20° 19.304' E 105° 37.616' | 7.7 | 539 | 28 | 8   | M |
| 23                        | Yen Quang Reservoir near Cúc Phương National Park                          | N20° 17.099' E 105° 43.492' | 9.0 | 177 | 29 | 36  | H |
| 24                        | Aquaculture pond 1, Van Phuong Commune, Nho Quan District                  | N20° 17.213' E 105° 45.155' | 9.2 | 262 | 31 | 174 | H |
| 25                        | Hồ Yên Quang (Yen Quang Reservoir)                                         | N20° 16.908' E 105° 43.836' | 8.2 | 368 | 31 | 24  | E |
| 26                        | Unnamed water body 1                                                       | near                        | 7.9 | 434 | 34 | 30  | H |
| 27                        | Unnamed water body 2                                                       | near                        | 8.1 | 347 | 32 | 9   | M |
| 28                        | Aquaculture pond 2, Van Phuong Commune, Nho Quan District                  | N20° 17.250' E 105° 45.096' | 7.9 | 343 | 31 | 52  | H |
| 29                        | Tràng An (Trang An Wetland – The World Cultural and Natural Heritage)      | N20° 15.662' E 105° 53.911' | 7.8 | 380 | 29 | 6   | M |
| 30                        | Unnamed reservoir in Ninh Binh city                                        | N20° 15.417' E 105° 56.784' | 8.3 | 870 | 31 | 22  | E |
| 31                        | Vân Long (Van Long Wetland Nature Reserve)                                 | N20° 21.933' E 105° 52.919' | 7.4 | 480 | 34 | 15  | E |
| 32                        | Temporary water body 3                                                     | N20° 21.860' E 105° 52.800' | 7.3 | 343 | 35 | 28  | H |
| 33                        | Unnamed water body 3                                                       | N20° 21.826' E 105° 52.866' | 7.1 | 668 | 35 | 11  | E |
| 34                        | Unnamed water body 4                                                       | N20° 21.772' E 105° 52.985' | 8.6 | 265 | 37 | 46  | H |
| 35                        | Unnamed water body 5                                                       | N20° 21.704' E 105° 52.918' | 7.1 | 333 | 33 | 16  | E |
| 36                        | Unnamed water body 6 in the rice field, Gia Van Commune, Gia Vien District | N20° 21.703' E 105° 52.910' | 7.0 | 335 | 34 | 18  | E |
| 37                        | Unnamed water body 7 in the rice field, Gia Van Commune, Gia Vien District | N20° 21.702' E 105° 52.915' | 7.0 | 336 | 33 | 24  | E |
| 38                        | Unnamed water body 8 in the rice field, Gia Van Commune, Gia Vien District | N20° 21.705' E 105° 52.917' | 6.9 | 382 | 34 | 27  | H |
| 39                        | Đầm Cút (Dam Cut Wetland)                                                  | N20° 22.899' E 105° 51.095' | 8.4 | 239 | 33 | 12  | E |
| 40                        | Đầm Cút (Dam Cut Wetland)                                                  | N20° 22.906' E 105° 51.070' | 7.4 | 453 | 30 | 32  | H |
| 41                        | Đầm Cút (Dam Cut Wetland)                                                  | N20° 22.894' E 105° 51.068' | 8.2 | 222 | 35 | 26  | H |
| <b>Thanh Hoa Province</b> |                                                                            |                             |     |     |    |     |   |
| 42                        | Hồ Đồng Bể (Dong Be Reservoir)                                             | N19° 45.486' E 105° 32.524' | 8.2 | 134 | 33 | 16  | E |
| 43                        | Hồ Lai Triều (Lai Trieu Reservoir)                                         | N19° 47.701' E 105° 31.375' | 8.2 | 98  | 33 | 38  | H |

|                         |                                                                  |                            |     |     |    |     |     |
|-------------------------|------------------------------------------------------------------|----------------------------|-----|-----|----|-----|-----|
|                         | Unnamed water body 9, swamp area                                 |                            |     |     |    |     |     |
| 44                      | near a small river, Quang Yen Commune, Quang Xuong District      | N19° 44.108' E105° 44.496' | 7.0 | 263 | 31 | 18  | E   |
| 45                      | Unnamed water body 10, Quang Yen Commune, Quang Xuong District   | near                       | 7.4 | 360 | 37 | 111 | H   |
| 46                      | Unnamed water body 11, Quang Yen Commune, Quang Xuong District   | near                       | 7.8 | 955 | 35 | 19  | E   |
| 47                      | Unnamed water body 12, Quang Yen Commune, Quang Xuong District   | near                       | 7.1 | 835 | 35 | 38  | H   |
| 48                      | Unnamed water body 13, Quang Thinh Commune, Quang Xuong District | N19° 45.627' E105° 45.976' | 7.4 | 91  | 34 | 22  | E   |
| 49                      | Sông Hoàng Giang (Hoang Giang River)                             | N19° 43.337' E105° 42.762' | 7.0 | 154 | 31 | 12  | E   |
| 50                      | Pond 3, Hai Van Commune, Nhu Thanh District                      | N19° 36.865' E105° 31.965' | 7.2 | 96  | 32 | 6   | M   |
| 51                      | Hồ Sông Mực 2 (Song Muc 2 Reservoir) in Ben En National Park     | N19° 36.995' E105° 32.061' | 7.3 | 92  | 31 | 8   | M   |
| 52                      | Pond 4, Hai Van Commune, Nhu Thanh District                      | N19° 36.981' E105° 32.094' | 7.1 | 92  | 33 | 7   | M   |
| 53                      | Hồ Yên Mỹ (Yen My Reservoir)                                     | N19° 29.694' E105° 39.882' | 8.1 | 120 | 33 | 5   | M   |
| 54                      | Pond 5 in the floodplain of the Nam River in Thanh Hoa city      | N19° 50.120' E105° 47.383' | 7.2 | 468 | 32 | 30  | H   |
| <b>Bac Kan Province</b> |                                                                  |                            |     |     |    |     |     |
| 55                      | Hồ Ba Be (Ba Be Lake), Ba Be National Park                       | N22° 23.718' E105° 37.969' | 7.9 | 174 | 22 | n/a | n/a |

---

**Table S2.** Distribution of *Mallomonas* and *Synura* species in water bodies of Hanoi. Localities numbers are listed in the Table S1, “+” indicates the presence of taxon.

| Taxon                       | Localities |          |          |          |          |          |          |          |          |          |          |          |          |          |          |          |          |          |          |          |
|-----------------------------|------------|----------|----------|----------|----------|----------|----------|----------|----------|----------|----------|----------|----------|----------|----------|----------|----------|----------|----------|----------|
|                             | 1          | 2        | 3        | 4        | 5        | 6        | 7        | 8        | 9        | 10       | 11       | 12       | 13       | 14       | 15       | 16       | 17       | 18       | 19       | 20       |
| <i>Mallomonas caudata</i>   |            | +        |          |          |          |          |          |          |          |          |          | +        |          |          |          |          |          | +        |          |          |
| <i>M. ceylanica</i>         |            |          |          |          |          |          |          |          |          |          | +        |          |          |          |          |          |          |          |          |          |
| <i>M. crassisquama</i>      |            | +        |          |          |          |          |          |          |          |          |          |          |          |          |          |          |          |          |          |          |
| <i>M. hexareticulata</i>    |            |          | +        |          | +        | +        |          |          |          |          |          |          |          | +        |          |          |          |          |          |          |
| <i>M. grata</i>             |            |          |          |          |          | +        |          |          |          |          |          |          |          |          |          |          |          |          |          |          |
| <i>M. kenyana</i>           | +          |          | +        | +        |          | +        |          |          | +        | +        | +        |          |          | +        |          | +        | +        | +        | +        | +        |
| <i>M. loricata</i>          |            |          |          |          |          |          | +        |          |          |          |          |          |          |          |          |          |          |          |          |          |
| <i>M. mangofera</i>         |            |          |          |          |          | +        |          |          |          |          |          |          |          |          |          |          |          |          |          |          |
| <i>M. morrisonensis</i>     |            |          |          |          |          |          |          |          |          |          |          |          |          |          |          | +        |          |          |          |          |
| <i>M. peronoides</i>        |            |          |          |          |          |          |          |          |          |          | +        |          |          |          |          |          |          |          |          |          |
| <i>M. portae-ferreae</i>    |            |          |          |          |          |          |          |          |          |          | +        |          |          |          |          |          |          |          |          |          |
| <i>M. pseudomatvienkoae</i> |            |          |          |          |          |          |          |          |          |          |          |          |          |          | +        |          |          |          |          |          |
| <i>M. rasilis</i>           |            |          |          |          |          |          |          |          |          |          |          |          |          |          |          |          | +        |          |          |          |
| <i>M. tonsurata</i>         |            | +        |          |          |          |          |          |          |          |          |          | +        | +        |          |          |          |          | +        |          |          |
| <i>M. vietnamica</i>        |            |          |          |          |          |          |          |          |          |          |          | +        |          |          |          |          |          |          |          |          |
| <i>Mallomonas</i> sp. 1     | +          |          |          | +        |          |          |          |          |          |          |          |          |          |          |          |          |          | +        |          |          |
| <i>Mallomonas</i> sp. 2     |            |          |          |          |          |          |          |          | +        |          |          |          |          |          |          |          |          |          |          |          |
| <i>Mallomonas</i> sp. 6     |            |          |          |          |          |          |          | +        |          |          |          |          |          |          |          |          |          |          |          |          |
| <i>Synura</i> sp. 1         |            |          |          |          |          |          |          |          |          |          | +        |          |          |          | +        | +        | +        | +        |          |          |
| <b>Total</b>                | <b>2</b>   | <b>3</b> | <b>2</b> | <b>2</b> | <b>1</b> | <b>4</b> | <b>1</b> | <b>1</b> | <b>2</b> | <b>1</b> | <b>5</b> | <b>3</b> | <b>1</b> | <b>2</b> | <b>2</b> | <b>3</b> | <b>3</b> | <b>5</b> | <b>1</b> | <b>1</b> |

**Table S3.** Distribution of *Mallomonas* and *Synura* species in water bodies of Ninh Binh Province. Localities numbers are listed in the Table S1, “+” indicates the presence of taxon.

| Taxon                                          | Localities |          |          |          |          |          |          |          |           |          |           |          |          |          |          |          |          |          |          |          |          |
|------------------------------------------------|------------|----------|----------|----------|----------|----------|----------|----------|-----------|----------|-----------|----------|----------|----------|----------|----------|----------|----------|----------|----------|----------|
|                                                | 21         | 22       | 23       | 24       | 25       | 26       | 27       | 28       | 29        | 30       | 31        | 32       | 33       | 34       | 35       | 36       | 37       | 38       | 39       | 40       | 41       |
| <i>Mallomonas acaroides</i>                    |            |          |          |          | +        |          |          |          |           |          |           |          |          |          |          |          |          |          |          |          |          |
| <i>M. ceylanica</i>                            |            |          |          |          |          |          |          |          | +         |          |           |          |          |          |          |          |          |          |          | +        |          |
| <i>M. favosa</i> f. <i>favosa</i>              |            |          |          |          |          |          |          |          | +         |          |           |          |          |          |          |          |          |          |          |          |          |
| <i>M. favosa</i> f. <i>gemina</i>              |            |          |          |          |          |          |          |          |           |          |           |          |          |          |          |          | +        |          |          |          |          |
| <i>M. grata</i>                                |            |          |          |          |          |          |          |          |           |          |           |          |          |          |          |          |          |          |          | +        |          |
| <i>M. guttata</i>                              |            |          |          |          |          |          |          |          |           |          | +         |          |          |          |          |          |          |          |          |          |          |
| <i>M. kenyana</i>                              |            |          |          | +        |          |          | +        | +        | +         |          | +         | +        | +        | +        |          |          |          | +        | +        | +        |          |
| <i>M. mangofera</i>                            |            |          |          |          |          |          |          |          |           |          |           |          | +        |          |          |          |          | +        | +        |          |          |
| <i>M. cf. mangofera</i> var. <i>reticulata</i> |            | +        | +        |          |          |          |          | +        |           |          | +         |          |          |          | +        | +        | +        |          |          |          |          |
| <i>M. matvienkoeae</i> var. <i>siveri</i>      |            |          |          |          |          |          |          |          | +         |          | +         |          |          |          |          |          |          |          |          |          |          |
| <i>M. morrisonensis</i>                        |            | +        |          |          |          |          |          |          |           |          |           |          |          |          |          |          |          |          |          |          |          |
| <i>M. paragrandis</i>                          | +          |          |          |          |          |          |          |          | +         |          |           |          |          |          |          |          |          |          |          |          |          |
| <i>M. parvula</i>                              |            |          |          |          |          |          |          |          |           |          | +         |          |          |          |          |          |          |          |          |          |          |
| <i>M. peronoides</i>                           | +          |          |          |          | +        |          |          | +        | +         |          | +         | +        | +        | +        | +        | +        | +        | +        | +        |          |          |
| <i>M. portae-ferreae</i>                       |            |          |          | +        | +        |          |          |          |           |          |           |          |          |          | +        | +        |          |          |          |          |          |
| <i>M. pseudocratis</i>                         |            |          |          |          |          |          |          |          | +         |          | +         |          |          |          |          |          |          |          |          |          |          |
| <i>M. rasilis</i>                              |            |          | +        |          |          |          |          |          | +         |          |           |          |          | +        |          |          |          |          |          | +        |          |
| <i>M. siderea</i>                              |            |          |          |          |          |          |          |          |           |          |           |          |          |          |          |          |          |          |          | +        |          |
| <i>M. tonsurata</i>                            |            |          |          |          |          |          |          |          |           |          |           |          |          |          |          |          |          |          |          |          | +        |
| <i>Mallomonas</i> sp. 1                        | +          |          |          |          |          |          |          |          | +         |          | +         |          |          |          |          |          |          |          |          | +        |          |
| <i>Mallomonas</i> sp. 3                        |            |          |          |          |          |          |          |          |           |          | +         |          |          |          | +        | +        |          | +        |          |          |          |
| <i>Mallomonas</i> sp. 4                        |            |          |          |          |          |          |          |          |           |          |           |          |          |          |          |          |          |          |          |          |          |
| <i>Synura</i> sp. 1                            |            |          |          |          |          | +        | +        |          | +         | +        | +         | +        | +        |          | +        | +        | +        | +        |          | +        |          |
| <b>Total</b>                                   | <b>3</b>   | <b>2</b> | <b>2</b> | <b>2</b> | <b>3</b> | <b>1</b> | <b>2</b> | <b>3</b> | <b>10</b> | <b>1</b> | <b>10</b> | <b>3</b> | <b>4</b> | <b>3</b> | <b>5</b> | <b>5</b> | <b>5</b> | <b>5</b> | <b>2</b> | <b>7</b> | <b>1</b> |

**Table S4.** Distribution of *Mallomonas* and *Synura* species in water bodies of Thanh Hoa Province. Localities numbers are listed in the Table S1, “+” indicates the presence of taxon.

| Taxon                                          | Localities |          |           |          |          |          |          |          |          |          |          |          |          |
|------------------------------------------------|------------|----------|-----------|----------|----------|----------|----------|----------|----------|----------|----------|----------|----------|
|                                                | 42         | 43       | 44        | 45       | 46       | 47       | 48       | 49       | 50       | 51       | 52       | 53       | 54       |
| <i>Mallomonas caudata</i>                      |            |          |           |          |          |          | +        |          |          | +        | +        | +        |          |
| <i>M. crassisquama</i>                         |            | +        |           |          |          |          | +        |          |          | +        | +        | +        |          |
| <i>M. hexareticulata</i>                       |            |          |           |          |          |          | +        | +        |          |          |          |          |          |
| <i>M. grata</i>                                |            |          |           |          |          |          |          |          |          |          |          |          | +        |
| <i>M. kenyana</i>                              |            |          | +         |          | +        | +        | +        | +        |          |          |          |          | +        |
| <i>M. korshikovii</i>                          |            |          |           |          |          |          |          |          |          |          | +        |          |          |
| <i>M. lamii</i>                                |            |          | +         |          |          |          | +        | +        |          |          |          |          |          |
| <i>M. mangofera</i>                            |            |          | +         |          |          |          | +        | +        |          |          |          |          | +        |
| <i>M. mangofera</i> var. <i>foveata</i>        |            |          |           | +        |          |          |          |          |          |          |          |          | +        |
| <i>M. cf. mangofera</i> var. <i>reticulata</i> |            |          |           |          | +        |          |          |          |          |          |          |          |          |
| <i>M. morrisonensis</i>                        |            |          | +         |          |          |          |          |          |          |          |          |          |          |
| <i>M. neoampla</i>                             |            |          | +         |          |          |          | +        |          |          |          |          |          |          |
| <i>M. paragrandsis</i>                         |            |          | +         |          |          |          |          |          |          |          | +        |          |          |
| <i>M. peronoides</i>                           |            |          | +         | +        |          |          | +        | +        |          |          |          |          | +        |
| <i>M. portae-ferreae</i>                       |            |          | +         |          |          |          |          |          |          |          |          |          |          |
| <i>M. pseudomatvienkoae</i>                    |            |          | +         |          |          |          |          |          |          |          |          |          |          |
| <i>M. rasilis</i>                              | +          | +        |           |          |          |          |          |          |          |          |          |          |          |
| <i>M. siderea</i>                              |            |          |           |          |          |          |          |          |          |          |          |          | +        |
| <i>M. spinosa</i>                              |            |          | +         |          |          |          |          |          |          |          |          |          |          |
| <i>M. tonsurata</i>                            | +          | +        |           |          | +        |          |          |          |          |          | +        | +        |          |
| <i>Mallomonas</i> sp. 1                        | +          | +        |           |          |          |          |          |          |          | +        | +        |          |          |
| <i>Mallomonas</i> sp. 2                        |            |          | +         |          |          |          |          |          |          |          |          |          |          |
| <i>Mallomonas</i> sp. 3                        |            |          | +         | +        |          |          |          | +        |          |          |          |          |          |
| <i>Mallomonas</i> sp. 6                        |            |          | +         | +        |          |          |          | +        |          |          |          |          |          |
| <i>Synura</i> sp. 1                            | +          |          | +         | +        | +        | +        | +        | +        | +        |          | +        |          |          |
| <i>Synura</i> sp. 2                            |            |          | +         |          |          |          |          |          |          |          |          |          |          |
| <b>Total</b>                                   | <b>4</b>   | <b>4</b> | <b>15</b> | <b>5</b> | <b>4</b> | <b>2</b> | <b>9</b> | <b>8</b> | <b>1</b> | <b>3</b> | <b>7</b> | <b>3</b> | <b>6</b> |
